# Supplementary material for: Development of a Genome-Informed Protocol for Detection of Pseudomonas amygdali pv. morsprunorum Using LAMP and PCR
Source: MDPI journal article supplement (doi:10.3390/plants12244119), 2023-12-10
Supplement: s1 [file s1]

**Table S1.** Identification of the seven isolates used for MLSA and ANIb extracted from NCBI.

| <b>Isolate Code</b>                  | <b>Accession Number</b> |
|--------------------------------------|-------------------------|
| PSS B31D                             | GCA_029763995           |
| <i>P. savastanoi</i>                 | CP076652                |
| <i>P. amygdali</i> pv. <i>tabaci</i> | NZ_CP042804             |
| CFBP2116                             | GCA_900289105           |
| <i>P. avellanae</i>                  | NZ_AVEP02000336         |
| <i>P. viridiflava</i>                | NZ_LT855280             |
| PSS B728                             | CP000075                |
