# Supplementary material for: Development of a Genome-Informed Protocol for Detection of Pseudomonas amygdali pv. morsprunorum Using LAMP and PCR
Source: MDPI journal article supplement (doi:10.3390/plants12244119), 2023-12-10
Supplement: s1 [file s1]

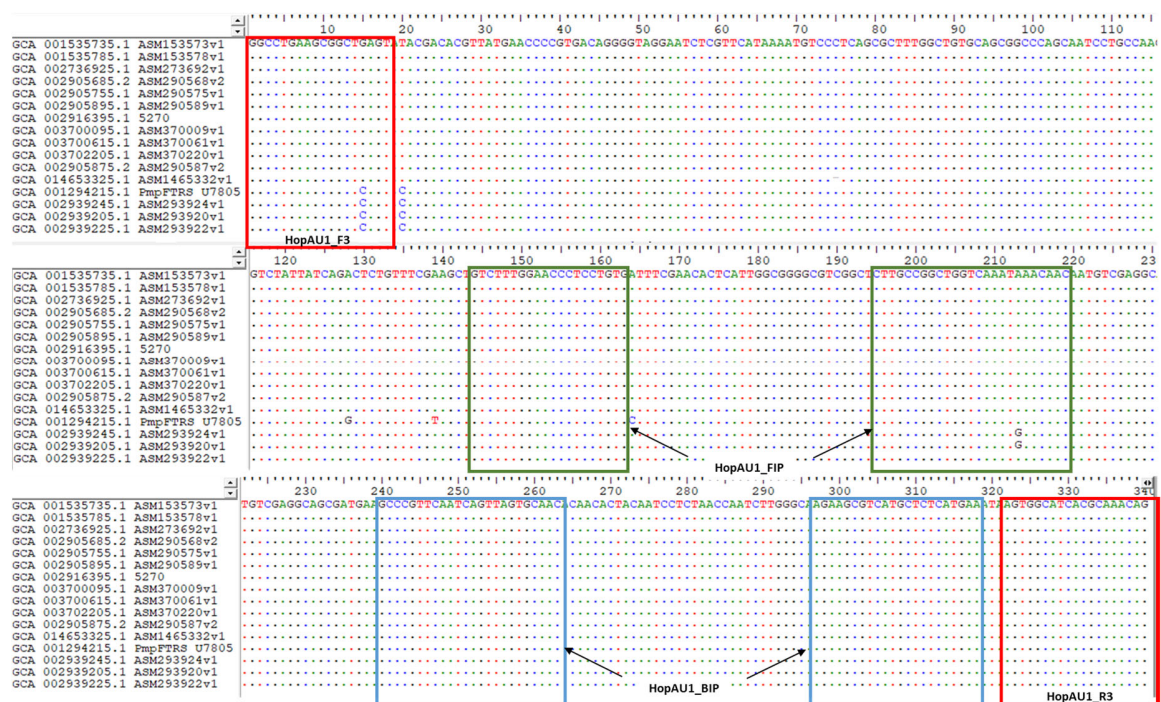

**Figure S2.** Alignment of the target region used for primers design, extracted from sixteen isolates of *Pseudomonas amygdali* pv. *morsprunorum* available in Genbank. Colored boxes represent the designed primers and are labeled with the corresponding name.
