# Supplementary material for: Development of a Genome-Informed Protocol for Detection of Pseudomonas amygdali pv. morsprunorum Using LAMP and PCR
Source: MDPI journal article supplement (doi:10.3390/plants12244119), 2023-12-10
Supplement: s1 [file s1]

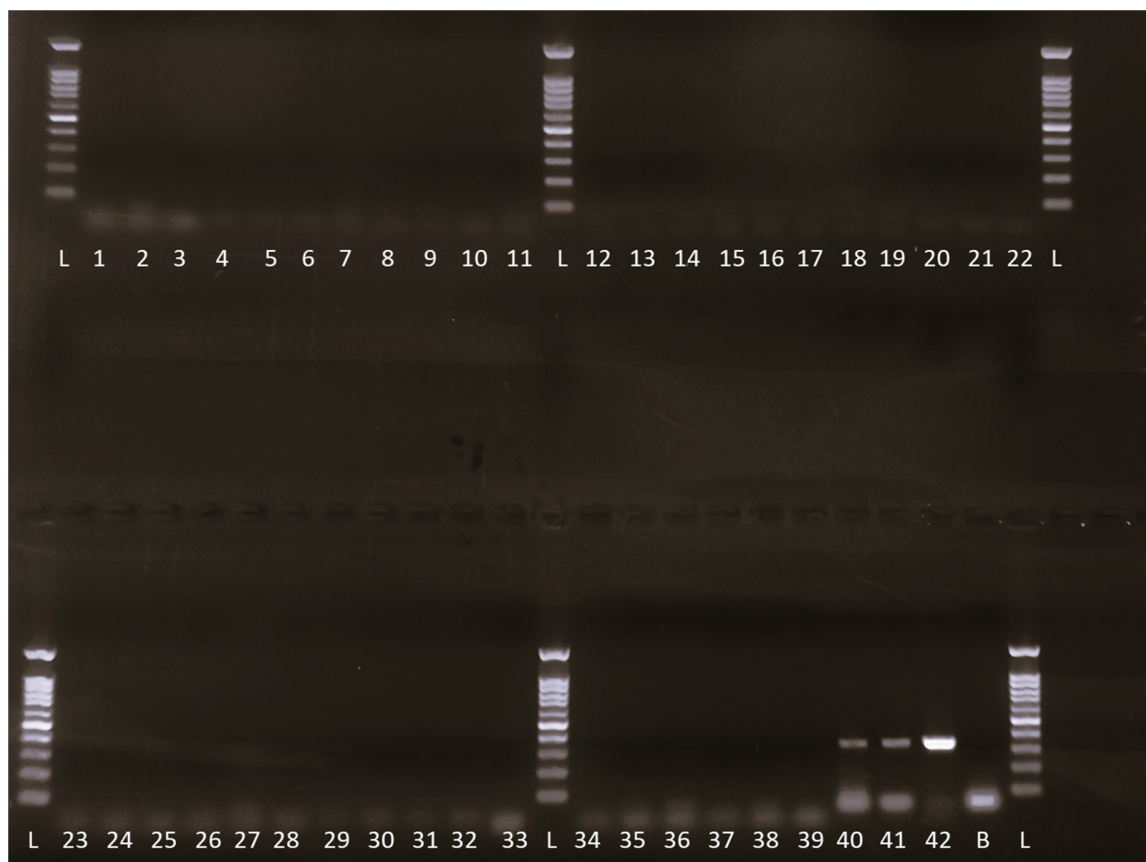

**Figure S3.** Determination of the specificity of Pam PCR amplification. Samples were loaded as described: (L) 100bp DNA Ladder; Lanes 1-8: *Agrobacterium* sp.; Lane 9: *Xanthomonas* sp.; Lanes 10-39: *Pseudomonas* sp; Lane 40: 11116B2; Lane 41: S1-Pam; Lane 42: S2-Pam; Lane B: Blank control.
