# Supplementary material for: Development of a Genome-Informed Protocol for Detection of Pseudomonas amygdali pv. morsprunorum Using LAMP and PCR
Source: MDPI journal article supplement (doi:10.3390/plants12244119), 2023-12-10
Supplement: s1 [file s1]

|                               |                            | 1  | 2     | 3     | 4     | 5     | 6     | 7      | 8     | 9     | 10     | 11    | 12     | 13    | 14     | 15    | 16    | 17    | 18    | 19    | 20    | 21    | 22    | 23     | 24     |
|-------------------------------|----------------------------|----|-------|-------|-------|-------|-------|--------|-------|-------|--------|-------|--------|-------|--------|-------|-------|-------|-------|-------|-------|-------|-------|--------|--------|
|                               | CFBP2116                   | 1  |       | 88.07 | 98.73 | 99.98 | 88.00 | 99.99  | 99.98 | 99.98 | 99.91  | 99.96 | 88.01  | 99.98 | 99.06  | 98.73 | 99.06 | 88.07 | 99.98 | 99.99 | 99.97 | 99.94 | 99.98 | 99.98  | 99.98  |
|                               | GCA_000145745.1_ASM14574v1 | 2  | 88.07 |       | 88.05 | 88.12 | 99.97 | 88.08  | 88.10 | 88.13 | 88.11  | 88.09 | 88.12  | 99.99 | 88.11  | 88.13 | 88.06 | 88.13 | 99.99 | 88.14 | 88.10 | 88.14 | 88.09 | 88.12  | 88.13  |
| GCA_001294215.1_PmpFTRS_U7805 |                            | 3  | 98.73 | 88.05 |       | 98.70 | 88.13 | 98.70  | 98.71 | 98.69 | 98.68  | 98.64 | 98.68  | 88.08 | 98.70  | 98.71 | 99.98 | 98.70 | 88.06 | 98.73 | 98.69 | 98.69 | 98.68 | 98.70  | 98.69  |
| GCA_001535735.1_ASM153573v1   |                            | 4  | 99.98 | 88.12 | 98.70 |       | 88.15 | 99.98  | 99.98 | 99.98 | 99.94  | 99.89 | 99.93  | 88.20 | 99.99  | 99.03 | 98.70 | 99.03 | 88.13 | 99.96 | 99.98 | 99.96 | 99.93 | 99.98  | 99.97  |
| GCA_001535755.1_ASM153575v1   |                            | 5  | 88.00 | 99.97 | 88.13 | 88.15 |       | 88.15  | 88.12 | 88.17 | 88.11  | 88.10 | 88.12  | 99.98 | 88.14  | 88.14 | 88.08 | 88.13 | 99.98 | 88.15 | 88.12 | 88.17 | 88.10 | 88.10  | 88.12  |
| GCA_001535785.1_ASM153578v1   |                            | 6  | 99.99 | 88.08 | 98.70 | 99.98 | 88.15 |        | 99.98 | 99.99 | 99.94  | 99.90 | 99.94  | 88.19 | 100.00 | 99.04 | 98.70 | 99.04 | 88.10 | 99.96 | 99.98 | 99.97 | 99.94 | 99.98  | 99.98  |
| GCA_002736925.1_ASM273692v1   |                            | 7  | 99.98 | 88.10 | 98.71 | 99.98 | 88.12 | 99.98  |       | 99.98 | 99.94  | 99.89 | 99.93  | 88.16 | 99.98  | 99.03 | 98.71 | 99.03 | 88.11 | 99.96 | 99.98 | 99.96 | 99.94 | 99.97  | 99.97  |
| GCA_002905685.2_ASM290568v2   |                            | 8  | 99.98 | 88.13 | 98.69 | 99.98 | 88.17 | 99.99  | 99.98 |       | 99.93  | 99.88 | 99.93  | 88.21 | 99.99  | 99.02 | 98.69 | 99.01 | 88.15 | 99.96 | 99.97 | 99.96 | 99.93 | 99.98  | 99.97  |
| GCA_002905755.1_ASM290575v1   |                            | 9  | 99.96 | 88.11 | 98.68 | 99.94 | 88.11 | 99.94  | 99.94 | 99.93 |        | 99.93 | 100.00 | 88.16 | 99.93  | 99.01 | 98.68 | 99.01 | 88.12 | 99.95 | 99.94 | 99.93 | 99.92 | 99.93  | 99.94  |
| GCA_002905875.2_ASM290587v2   |                            | 10 | 99.91 | 88.09 | 98.64 | 99.89 | 88.10 | 99.90  | 99.89 | 99.88 | 99.93  |       | 99.93  | 88.10 | 99.89  | 98.97 | 98.63 | 98.97 | 88.11 | 99.90 | 99.90 | 99.88 | 99.87 | 99.90  | 99.88  |
| GCA_002905895.1_ASM290589v1   |                            | 11 | 99.96 | 88.12 | 98.68 | 99.93 | 88.12 | 99.94  | 99.93 | 99.93 | 100.00 | 99.93 |        | 88.16 | 99.93  | 99.01 | 98.68 | 99.01 | 88.13 | 99.95 | 99.94 | 99.93 | 99.91 | 99.93  | 99.92  |
| GCA_002916305.1_7968A         |                            | 12 | 88.01 | 99.99 | 88.08 | 88.20 | 99.98 | 88.19  | 88.16 | 88.21 | 88.16  | 88.10 | 88.16  |       | 88.18  | 88.11 | 88.08 | 88.11 | 99.99 | 88.15 | 88.20 | 88.18 | 88.10 | 88.11  | 88.12  |
| GCA_002916395.1_5270          |                            | 13 | 99.98 | 88.11 | 98.70 | 99.99 | 88.14 | 100.00 | 99.98 | 99.99 | 99.93  | 99.89 | 99.93  | 88.18 |        | 99.04 | 98.71 | 99.03 | 88.12 | 99.96 | 99.98 | 99.97 | 99.94 | 99.97  | 99.97  |
| GCA_002939205.1_ASM293920v1   |                            | 14 | 99.06 | 88.13 | 98.71 | 99.03 | 88.14 | 99.04  | 99.03 | 99.02 | 99.01  | 98.97 | 99.01  | 88.11 | 99.04  |       | 98.71 | 99.98 | 88.13 | 99.03 | 99.04 | 99.02 | 99.01 | 99.03  | 99.02  |
| GCA_002939225.1_ASM293922v1   |                            | 15 | 98.73 | 88.06 | 99.98 | 98.70 | 88.08 | 98.70  | 98.71 | 98.69 | 98.68  | 98.63 | 98.68  | 88.08 | 98.71  | 98.71 |       | 98.70 | 88.07 | 98.73 | 98.70 | 98.69 | 98.69 | 98.71  | 98.70  |
| GCA_002939245.1_ASM293924v1   |                            | 16 | 99.06 | 88.13 | 98.70 | 99.03 | 88.13 | 99.04  | 99.03 | 99.01 | 98.97  | 99.01 | 88.11  | 99.03 | 99.98  | 98.70 |       | 88.13 | 99.03 | 99.03 | 99.02 | 99.01 | 99.02 | 99.01  | 99.02  |
| GCA_003698945.1_ASM369894v1   |                            | 17 | 88.07 | 99.99 | 88.06 | 88.13 | 99.98 | 88.10  | 88.11 | 88.15 | 88.12  | 88.11 | 88.13  | 99.99 | 88.12  | 88.13 | 88.07 | 88.13 |       | 88.15 | 88.12 | 88.13 | 88.10 | 88.12  | 88.13  |
| GCA_003700095.1_ASM370009v1   |                            | 18 | 99.98 | 88.14 | 98.73 | 99.96 | 88.15 | 99.96  | 99.96 | 99.96 | 99.95  | 99.90 | 99.95  | 88.15 | 99.96  | 99.03 | 98.73 | 99.03 | 88.15 |       | 99.96 | 99.96 | 99.91 | 99.96  | 99.95  |
| GCA_003700615.1_ASM370061v1   |                            | 19 | 99.99 | 88.10 | 98.69 | 99.98 | 88.12 | 99.98  | 99.98 | 99.97 | 99.94  | 99.90 | 99.94  | 88.20 | 99.98  | 99.04 | 98.70 | 99.03 | 88.12 | 99.96 |       | 99.95 | 99.95 | 99.97  | 99.96  |
| GCA_003702205.1_ASM370220v1   |                            | 20 | 99.97 | 88.14 | 98.69 | 99.96 | 88.17 | 99.97  | 99.96 | 99.96 | 99.93  | 99.88 | 99.93  | 88.18 | 99.97  | 99.02 | 98.69 | 99.02 | 88.13 | 99.96 | 99.95 |       | 99.93 | 99.96  | 99.95  |
| GCA_014653325.1_ASM1465332v1  |                            | 21 | 99.94 | 88.09 | 98.68 | 99.93 | 88.10 | 99.94  | 99.94 | 99.93 | 99.92  | 99.87 | 99.91  | 88.10 | 99.94  | 99.01 | 98.69 | 99.01 | 88.10 | 99.91 | 99.95 | 99.93 |       | 99.95  | 99.93  |
|                               | S1 Psm                     | 22 | 99.98 | 88.12 | 98.70 | 99.98 | 88.10 | 99.98  | 99.97 | 99.98 | 99.93  | 99.90 | 99.93  | 88.11 | 99.97  | 99.03 | 98.71 | 99.02 | 88.12 | 99.96 | 99.97 | 99.96 | 99.95 |        | 100.00 |
|                               | S2 Psm                     | 23 | 99.98 | 88.12 | 98.70 | 99.97 | 88.12 | 99.98  | 99.97 | 99.97 | 99.92  | 99.88 | 99.92  | 88.12 | 99.97  | 99.02 | 98.70 | 99.01 | 88.13 | 99.95 | 99.96 | 99.95 | 99.93 | 100.00 |        |
|                               | Confligs 1111682           | 24 | 99.98 | 88.13 | 98.69 | 99.97 | 88.15 | 99.98  | 99.97 | 99.97 | 99.94  | 99.89 | 99.94  | 88.16 | 99.97  | 99.02 | 98.69 | 99.02 | 88.14 | 99.96 | 99.97 | 99.96 | 99.94 | 100.00 | 99.99  |

**Figure S1.** ANIb of the twelve isolates corresponding to *Pseudomonas* species (Table 1) with their respective identity percentage. The strain CFBP2116 (GCA\_900289105) was utilized as the reference.
