# Supplementary material for: Development of a Genome-Informed Protocol for Detection of Pseudomonas amygdali pv. morsprunorum Using LAMP and PCR
Source: MDPI journal article supplement (doi:10.3390/plants12244119), 2023-12-10
Supplement: s1 [file s1]

**Table S2.** Number of isolates per genera identified in this study.

| <b>Genera</b>                        | <b>Number of Isolates</b> |
|--------------------------------------|---------------------------|
| <i>Pantoea</i> sp.                   | 3                         |
| <i>Rosenbergiella</i> sp.            | 2                         |
| <i>Frondihabitans</i> sp.            | 1                         |
| <i>Microbacterium</i> sp.            | 3                         |
| <i>Rathayibacter</i> sp.             | 1                         |
| <i>Pseudoxanthomonas</i> sp.         | 1                         |
| <i>Stenotrophomonas</i> sp.          | 1                         |
| <i>Chitinophaga</i> sp.              | 1                         |
| <i>Rahnella</i> sp.                  | 1                         |
| <i>Streptomyces</i> sp.              | 1                         |
| <i>Brachybacterium</i> sp.           | 1                         |
| <i>Chryseobacterium</i> sp.          | 2                         |
| <i>Brevundimonas</i> sp.             | 1                         |
| <i>Flavobacterium</i> sp.            | 1                         |
| <i>Staphylococcus</i> sp.            | 1                         |
| <i>Rhizobiaceae</i> sp.              | 2                         |
| <i>Rhizobium</i> sp.                 | 4                         |
| <i>Kocuria</i> sp.                   | 2                         |
| <i>Bacillus</i> sp.                  | 11                        |
| <i>Ensifer</i> sp.                   | 2                         |
| <i>Unclassified Rhizobiaceae</i> sp. | 1                         |
| <i>Xanthomonas</i> sp.               | 1                         |
| <i>Sphingopyxis</i> sp.              | 3                         |
| <i>Pseudomonas</i> sp.               | 30                        |
| <i>Arthrobacter</i> sp.              | 2                         |
| <i>Variovorax</i> sp.                | 2                         |
| <i>Curtobacterium</i> sp.            | 19                        |
| <i>Sphingomonas</i> sp.              | 21                        |
| <i>Terribacillus</i> sp.             | 2                         |
| <i>Agrobacterium</i> sp.             | 8                         |
